# Supplementary material for: Isolation and Identification of Aeromonas veronii in Sheep with Fatal Infection in China: A Case Report
Source: MDPI journal article supplement (doi:10.3390/microorganisms11020333), 2023-01-29
Supplement: s1 [file s1]

# Supplementary Materials:

Table S1 Description of sick and dead sheep affected by this outbreak

|                          |        | sick                                                  | dead                                                             |
|--------------------------|--------|-------------------------------------------------------|------------------------------------------------------------------|
| Rate                     |        | 2.53% (15/594)                                        | 40.0% (6/15)                                                     |
| Gender                   | Male   | 6/15                                                  | 1/6                                                              |
|                          | Female | 9/15                                                  | 5/6                                                              |
| Age (month)              | <6     | 8/15                                                  | 3/6                                                              |
|                          | 6-12   | 5/15                                                  | 1/6                                                              |
|                          | >12    | 2/15                                                  | 2/6                                                              |
| Clinical signs           |        | dyspnoea, nasal discharge,<br>wet cough, hyperthermia | dyspnoea, nasal discharge,<br>diarrhea, wet cough,<br>emaciation |
| Treatment                |        | ampicillin, tylosin,<br>florfenicol, ceftiofur        |                                                                  |
| Lab analysis (YES or NO) |        | YES                                                   | YES                                                              |

Table S2 Primers used in this case report

| Primer sequence (5'-3')   |                          | pathogen | Target gene | Reference |
|---------------------------|--------------------------|----------|-------------|-----------|
| Foward                    | Reverse                  |          |             |           |
| TGAACGGAATATGTTAGCTT      | GACTTCATCCTGCACTCTGT     | M. O.    | 16S         | [12]      |
| GGACCATACAGGAGAAGTTGA     | CGCAGGTAAAGTGATCTGTAGC   | FMDV     | 3D          | [13]      |
| ATTGTCCACTATTGAATCCTTGAT  | TTGTCGTTGTAGACCTGACTGTTG | PPRV     | N           | [13]      |
| TGACACAGCAAATGTAACCGCAAG- | CCACGTTGGGCGCCAGCTGCGCGA | MAEDI    | gag         | [14]      |
| AGTGATCTAGATGATGATCCA     | GTTATTGATCCAATTGCTGT     | PIV      | M           | [15]      |
| TGCCAAAACATAACAGAAG       | TTTATTCACCTCTCCCTC       | RSV      | F           | [16]      |

Table S3 Biochemical characteristic of strain YL4077

| Test            | Result | Test                 | Result |
|-----------------|--------|----------------------|--------|
| Peptone         | +      | Sorbitol             | -      |
| Simmons citrate | +      | Voges-Proskauer test | +      |
| Uera            | -      | H2S                  | -      |
| Catalase        | +      | Glucose (gas)        | +      |
| Esculin         | -      | Indole               | +      |
| Sucrose         | -      | Lysine               | +      |
| Arabinose       | -      | Phenylalanine        | -      |
| Xylose          | -      | Ornithine            | -      |
| Lactose         | +      | Nitrate reduction    | +      |
| D-mannose       | +      | Glycerin             | +      |

Note: "+": Positive reaction; "-" Negative reaction.
